# Supplementary material
Source: Springer Nature journal article supplement (https://www.springermedizin.de/resource/supplementary/12876_2012_967_MOESM4_ESM.pdf/9437826)
Supplement: MOESM4 [file 9437826]

Polaprezinc group

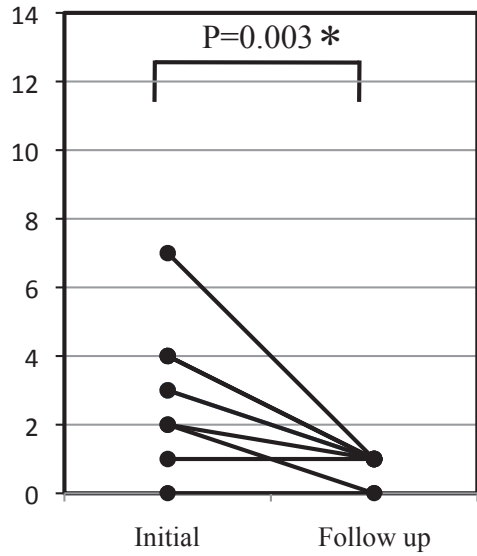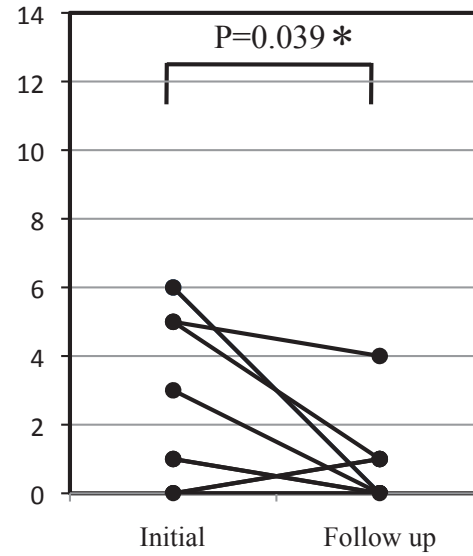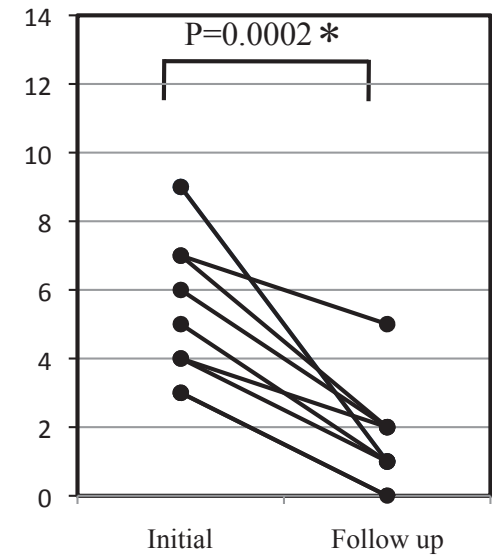

Control group

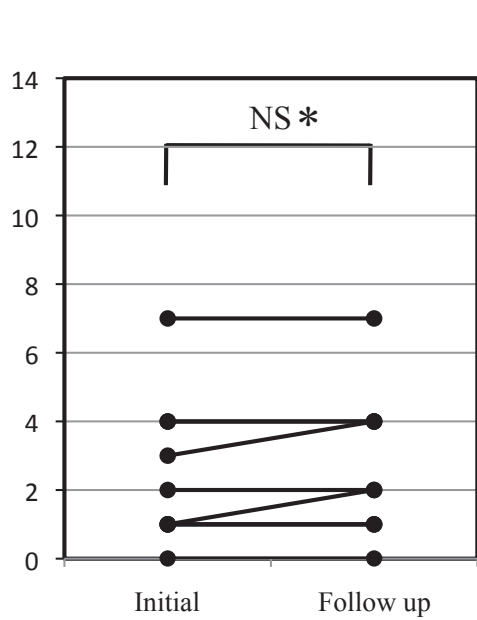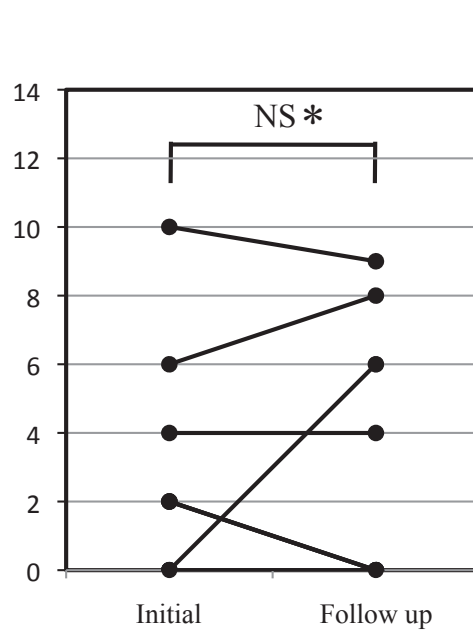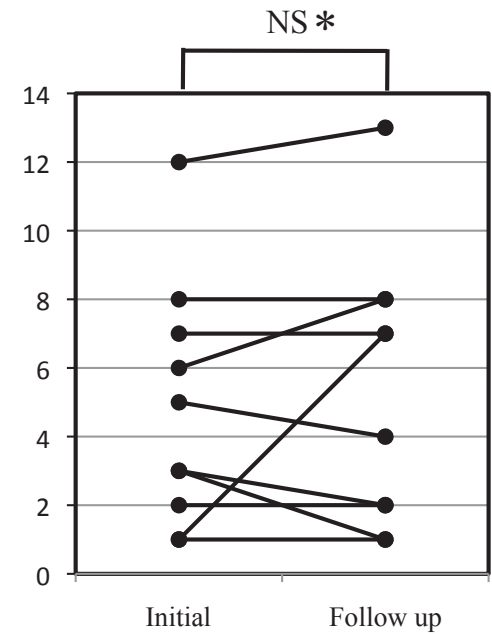

Reddened lesions

Erosions/ulcers

Total

Figure 4

\*by Wilcoxon signed-rank test
